# Microarray Data Reveal Relationship between Jag1 and Ddr1 in Mouse Liver

Lara A. Underkoffler<sup>1</sup>, Erikka Carr<sup>1</sup>, Anthony Nelson<sup>1</sup>, Matthew J. Ryan<sup>1,2</sup>, Reiner Schultz<sup>3</sup>, Kathleen M. Loomes<sup>1,2\*</sup>

**1** Division of Gastroenterology, Hepatology and Nutrition, The Children's Hospital of Philadelphia, Philadelphia, Pennsylvania, United States of America, **2** Department of Pediatrics, Raymond and Ruth Perelman School of Medicine at the University of Pennsylvania, Philadelphia, Pennsylvania, United States of America, **3** Department of Medical Genetics, Kings College, London, United Kingdom

## Abstract

Alagille syndrome is an autosomal dominant disorder involving bile duct paucity and cholestasis in addition to cardiac, skeletal, ophthalmologic, renal and vascular manifestations. Mutations in *JAG1*, encoding a ligand in the Notch signaling pathway, are found in 95% of patients meeting clinical criteria for Alagille syndrome. In order to define the role of *Jag1* in the bile duct developmental abnormalities seen in ALGS, we previously created a *Jag1* conditional knockout mouse model. Mice heterozygous for the *Jag1* conditional and null alleles demonstrate abnormalities in postnatal bile duct growth and remodeling, with portal expansion and increased numbers of malformed bile ducts. In this study we report the results of microarray analysis and identify genes and pathways differentially expressed in the *Jag1* conditional/null livers as compared with littermate controls. In the initial microarray analysis, we found that many of the genes up-regulated in the *Jag1* conditional/null mutant livers were related to extracellular matrix (ECM) interactions, cell adhesion and cell migration. One of the most highly up-regulated genes was *Ddr1*, encoding a receptor tyrosine kinase (RTK) belonging to a large RTK family. We have found extensive co-localization of Jag1 and Ddr1 in bile ducts and blood vessels in postnatal liver. In addition, co-immunoprecipitation data provide evidence for a novel protein interaction between Jag1 and Ddr1. Further studies will be required to define the nature of this interaction and its functional consequences, which may have significant implications for bile duct remodeling and repair of liver injury.

**Citation:** Underkoffler LA, Carr E, Nelson A, Ryan MJ, Schultz R, et al. (2013) Microarray Data Reveal Relationship between Jag1 and Ddr1 in Mouse Liver. PLoS ONE 8(12): e84383. doi:10.1371/journal.pone.0084383

**Editor:** Rudolf Kirchmair, Medical University Innsbruck, Austria

**Received:** May 8, 2013; **Accepted:** November 14, 2013; **Published:** December 31, 2013

**Copyright:** © 2013 Underkoffler et al. This is an open-access article distributed under the terms of the Creative Commons Attribution License, which permits unrestricted use, distribution, and reproduction in any medium, provided the original author and source are credited.

**Funding:** This work was funded by NIH R01 DK071841 to KML. The funders had no role in study design, data collection and analysis, decision to publish, or preparation of the manuscript.

**Competing Interests:** The authors have declared that no competing interests exist.

\* E-mail: loomes@email.chop.edu

## Introduction

Alagille syndrome (ALGS) is an autosomal dominant disorder involving bile duct paucity and cholestasis in addition to cardiac, skeletal, ophthalmologic, renal and vascular manifestations. Mutations in *JAG1*, encoding a ligand in the Notch signaling pathway, are found in 95% of patients meeting clinical criteria for ALGS, and a small number of patients have mutations in *NOTCH2* [1–3]. In order to define the role of *Jag1* in the bile duct developmental abnormalities seen in ALGS, we previously created a *Jag1* conditional knockout mouse model [4]. Conditional ablation of *Jag1* in hepatoblasts results in normal bile duct development, but mice heterozygous for the *Jag1* conditional and null alleles demonstrate abnormalities in postnatal bile duct growth and remodeling, with portal expansion and increased numbers of malformed bile ducts. In this study we report the results of microarray analysis and identify genes and pathways differentially expressed in the *Jag1* conditional/null livers as compared with littermate controls.

In the initial microarray analysis, we found that many of the genes up-regulated in the *Jag1* conditional/null mutant livers were related to extracellular matrix (ECM) interactions, cell adhesion and cell migration. One of the most highly up-regulated genes was

*Ddr1*, encoding a receptor tyrosine kinase (RTK) belonging to a large RTK family. Ddr1 is unusual in that it is activated by various collagen ligands as opposed to the classical RTK activation via soluble growth factors [5], and receptor activation by extracellular collagen might provide a mechanism for cell-to-ECM communication [6]. Information from published literature regarding Ddr1 structure and function led us to hypothesize that Jag1 and Ddr1 might interact in the extracellular matrix during normal bile duct development and remodeling. First, reported functions of Ddr1 include cell growth, migration, adhesion and branching tubulogenesis [5,7–9], all properties that are known to be crucial for the normal growth and remodeling of bile ducts. In addition, loss of *Jag1* or *Ddr1* in a mouse model leads to similar inner ear phenotypes. *Ddr1*<sup>-/-</sup> mice exhibit hearing loss by 2 months of age as a result of progressive deterioration of the sensory epithelium within the organ of Corti, as well as morphological defects in the cells that make up the stria vascularis including strial cells, basal cells, marginal cells and intermediate cells. Overall, Ddr1 function is thought to be essential for maintaining tissue architecture and controlling collagen deposition in the inner ear [8]. The Notch ligand *Jag1* also plays a role in inner ear development of the mouse [10]. The headturner (Htu) mouse, a *Jag1* loss-of-function mutant, displays a reduction in the number of

outer hair cells in the organ of Corti as well as a significant increase in the number of inner hair cells [10]. Finally, a recent study has identified Notch1 as a direct target of collagen-mediated Ddr1 activation [11]. Up-regulation of Hes1 was demonstrated in breast cancer cells as well as colorectal carcinoma cells, indicating canonical Notch signaling is activated through this interaction [11].

In this study, we report the results of microarray analyses to identify differentially expressed genes and pathways in *Jag1* conditional/null livers, which reveal up-regulation of many genes related to fibrosis and ECM interactions. In addition, we present protein expression data showing extensive co-localization of Jag1 and Ddr1 in bile ducts and blood vessels in postnatal liver. Finally, co-immunoprecipitation of the proteins provides evidence for a novel protein interaction between Jag1 and Ddr1.

## Materials and Methods

### Mice and Breeding

Genetic strains used in these experiments include *Jag1<sup>loxP</sup>* [4], *Jag1<sup>dDSL</sup>* [12], and the Alfp-Cre transgenic line [13]. The *Jag1<sup>loxP</sup>* and Alfp-Cre mice were initially maintained on a C57Bl6/SvEv background, and now have been backcrossed to C57Bl/6J for >10 generations. The *Jag1<sup>dDSL</sup>* mice were maintained on a C57Bl/6J background (backcrossed >10 generations). Genotyping for all mice was performed by PCR analysis using genomic DNA isolated from the tail tip of weanling mice. All procedures involving mice were conducted in accordance with federal guidelines and approved Institutional Animal Care and Use Committee protocols. All animals received humane care according to the criteria outlined in the “Guidelines for the Care and Use of Laboratory Animals.”

### Ethics Statement

This study was carried out in strict accordance with the recommendations in the Guide for the Care and Use of Laboratory Animals of the National Institutes of Health. The protocol was approved by the Institutional Care and Use Committee at The Children’s Hospital of Philadelphia (Approval number 2010-11-431). All attempts were made to minimize suffering.

### Microarray Analysis

RNA was generated from 3 *Jag1* conditional/null mutant adult liver samples, each with a littermate control. Samples were obtained from mice at 12 weeks, 8 weeks and 4 weeks of age. Biotin-labeled cRNA probes were synthesized and hybridized to Affymetrix® Mouse Genome 430A 2.0 GeneChip Arrays. Data were analyzed with the ArrayAssist software (Stratagene) to generate GC-RMA absolute expression values, which were log-transformed and subjected to a t-test to identify differentially-expressed candidate genes. Student t-test was performed between the 2 groups of samples (n = 3 for mutants and controls) for each probe set on the array. Genes with a fold change greater than or equal to 2.5 and an uncorrected p-value less than 0.05 were selected for further study. Data were also analyzed by Spotfire and Ingenuity Pathway Analysis. The microarray dataset has been submitted to Gene Expression Omnibus with accession number GSE46577.

### PCR Array Analysis

In order to validate the results of the microarray experiment, custom PCR arrays (SA Biosciences®, Valencia, CA) were designed, including 8 genes of interest identified as being

differentially expressed in the mutant liver samples by the criteria listed above (see Table 1 for a complete gene list and Table 2 for genes included on the custom array) and *Hprt* as a housekeeping gene. RNA and cDNA were prepared from *Jag1* conditional/null and control mouse livers obtained at 4, 8 and 12 weeks. Changes in gene expression were calculated using the  $\Delta\Delta CT$  method, and results expressed as fold change relative to selected housekeeping genes. Samples from each mutant group were compared to their respective littermate controls.

Differential gene expression was also assessed between mutant and control livers using the Extracellular Matrix and Adhesion Molecule PCR Array (SA Biosciences®, Valencia, CA). This real time PCR-based array measures expression of 84 ECM-related genes. RNA and cDNA were prepared from *Jag1* conditional/null and control mouse livers obtained at 12–16 weeks (n = 3) and 4 weeks of age (n = 3). Changes in gene expression were calculated using the  $\Delta\Delta CT$  method, and results expressed as fold change relative to selected housekeeping genes. Samples from each mutant group were compared to averages of controls in all age groups (n = 8).

### Sirius Red Staining

Livers were collected and fixed in buffered formalin and paraffin embedded, followed by sectioning at 5  $\mu$ m-thickness. Sirius Red staining was performed as in [14].

### Immunofluorescence

Livers were collected at appropriate time points and embedded in OCT compound, snap frozen and stored at  $-80^{\circ}\text{C}$ . Immunofluorescent staining was performed on 5  $\mu$ m frozen sections of mouse liver. Slides were fixed in cold acetone and washed in PBS. Sections were incubated at room temperature in 0.25% triton-X for antigen retrieval and blocked with Pro-block from ScyTek laboratories (Logan, UT). Primary antibodies were applied at appropriate dilutions and slides were incubated from 2 hours to overnight. Jag1 sc-6011 from Santa Cruz Biotech was used at 1:50 dilution, Ddr1 sc-532 also from Santa Cruz Biotech was used at 1:100 dilution and CK19 TROMA-III antibody (Developmental Studies Hybridoma Bank, University of Iowa) was used at 1:75 dilution. Slides were washed in PBS and incubated with secondary antibodies for 1 hour at room temperature in darkened conditions. Secondary antibodies used were Dylight® 649-conjugated donkey anti-goat at a dilution of 1:400, Cy2-conjugated donkey anti-rat at a dilution of 1:400 and Cy3-conjugated donkey anti-rabbit at a dilution of 1:600 (all from Jackson ImmunoResearch, West Grove, PA). Nuclei were stained with DAPI for 20 seconds. Finished specimens were viewed with the Olympus BX-51 fluorescent microscope (Center Valley, PA).

### Co-immunoprecipitation and Western Blot

Immunoprecipitation was performed using the Co-Immunoprecipitation kit from Pierce® ThermoScientific (Rockford, IL). Antibodies were first de-salted and cleaned using the Pierce antibody clean-up kit. The antibodies were then immobilized through the covalent coupling onto an amine-reactive resin. Liver lysates were made using PBS with 5 mM EDTA, 1 mM  $\text{CaCl}_2$ , 0.02% sodium azide plus appropriate protease- and phosphatase-inhibitors. Approximately 200  $\mu$ g of lysate per antibody were pre-cleared using a deactivated control resin, supplied by the manufacturer, by incubating for 1 hour at  $4^{\circ}\text{C}$ . Binding of target and prey proteins were carried out at the same temperature overnight. Bound products were eluted following several washes to remove unbound proteins. Western analysis followed to identify IP and Co-IP products.

**Table 1.** Genes Up-regulated in Mutant Liver Samples, with Fold Change >2.5.

| Unigene   | Gene Symbol          | Gene Title                                              | Fold Change |
|-----------|----------------------|---------------------------------------------------------|-------------|
| Mm.29798  | Cd34 <sup>a*</sup>   | CD34 antigen                                            | 5.9085      |
| Mm.286834 | Bicc1                | bicaudal C homolog 1 (Drosophila)                       | 5.5558      |
| Mm.182785 | Emp1*                | epithelial membrane protein 1                           | 5.5109      |
| Mm.28935  | Dpt <sup>b*</sup>    | dermatopontin                                           | 5.3057      |
| \N        | LOC672274*           | similar to Transcription factor SOX-4                   | 4.4639      |
| Mm.10760  | Osmr <sup>c</sup>    | oncostatin M receptor                                   | 4.1651      |
| Mm.7562   | Col6a3 <sup>b</sup>  | procollagen, type VI, alpha 3                           | 4.0085      |
| Mm.260227 | Pak1                 | p21 (CDKN1A)-activated kinase 1                         | 3.9983      |
| Mm.18888  | Lum <sup>b</sup>     | lumican                                                 | 3.7683      |
| Mm.2408   | C3ar1*               | complement component 3a receptor 1                      | 3.4893      |
| Mm.250492 | Lox1 <sup>b</sup>    | lysyl oxidase-like 1                                    | 3.4667      |
| Mm.5021   | Ddr1 <sup>d</sup>    | discoidin domain receptor family, member 1              | 3.4395      |
| Mm.4146   | Pdgfrb <sup>c*</sup> | platelet derived growth factor receptor, beta           | 3.4275      |
| Mm.211535 | Olfml3               | olfactomedin-like 3                                     | 3.4268      |
| Mm.252321 | Synpo                | synaptopodin                                            | 3.4033      |
| Mm.42163  | Casp12*              | caspase 12                                              | 3.3781      |
| Mm.112933 | Adamts5 <sup>e</sup> | a disintegrin-like and metalloproteinase/thrombospondin | 3.3192      |
| Mm.4691   | Nid1 <sup>b</sup>    | nidogen 1                                               | 3.3091      |
| Mm.200916 | Gpx3                 | glutathione peroxidase 3                                | 3.1160      |
| \N        | LOC637870*           | similar to Nedd4 WW binding protein 4                   | 3.0118      |
| Mm.20897  | Clca1*               | chloride channel calcium activated 1                    | 2.9732      |
| Mm.432071 | Gdf10*               | growth differentiation factor 10                        | 2.9487      |
| Mm.221403 | Pdgfra <sup>c*</sup> | platelet derived growth factor receptor, alpha          | 2.9136      |
| Mm.13787  | Cp*                  | ceruloplasmin                                           | 2.8745      |
| Mm.292100 | Fgl2*                | fibrinogen-like protein 2                               | 2.6800      |
| Mm.7214   | Anxa3                | annexin A3                                              | 2.6550      |
| Mm.206505 | Timp2 <sup>e</sup>   | tissue inhibitor of metalloproteinase 2                 | 2.6139      |
| Mm.10125  | Ift81*               | intraflagellar transport 81 homolog                     | 2.5475      |

<sup>a</sup>cell adhesion,<sup>b</sup>ECM structural proteins,<sup>c</sup>Fibrosis-related receptor,<sup>d</sup>ECM interacting proteins,<sup>e</sup>ECM remodeling proteins.

\*genes with p-values&lt;or=0.01.

Microarray analysis of Jag1 conditional/null adult mouse livers as compared to controls. Genes with fold changes greater than 2.5 and uncorrected p-values of &lt;0.05 are listed and show expression increases in genes regulating extracellular matrix interactions and remodeling as well as cell adhesion and fibrosis.

doi:10.1371/journal.pone.0084383.t001

The Jag1 sc-6011 and Ddr1 sc-532 rabbit antibodies manufactured by Santa Cruz Biotechnology, Inc (Santa Cruz, CA) were used at a 1:200 dilution for western blots. Approximately 25 µg of each antibody was coupled to the AminoLink resin (Pierce® ThermoScientific, Rockford, IL). In addition to the proteins of interest, an irrelevant antibody (SC-324 rabbit polyclonal anti-Tie2, Santa Cruz Biotechnology, Santa Cruz, CA) was also coupled and used as a negative control in the western analysis.

### Jag1 Real-time PCR on Whole Newborn Liver

Total RNA was prepared from whole liver newborn mutant and control livers. cDNA was prepared from 4 µg of total RNA using the high capacity RNA-to-cDNA kit from Applied Biosystems (Carlsbad, CA). Assuming 100% conversion of RNA to cDNA, 100 ng of cDNA was used per 20 µl PCR reaction. Each sample was prepared in quadruplicate using TaqMan Gene Expression assays for the housekeeping gene, *Hprt1* (Mm00446968\_m1) as

well as for *Jag1* (Mm00496904\_m1). The *Jag1* probe is a made-to-order probe that encompasses the region of the targeted *Jag1* deletion including exons 4 and 5. The plates were run using an Applied Biosystems 7300/7500 Real-Time PCR Standard System using the default program of 50 degrees for 2 minutes, 95 degrees for 10 minutes and 40 cycles of 95 degrees for 15 seconds, 60 degrees for 1 minute. Data were analyzed using  $\Delta\Delta CT$  method with Applied Biosystems 7500 Real-Time PCR System Software v1.4.

## Results

### Gene Expression Analysis Reveals Upregulation of Fibrosis-related Genes in Mutant Livers

After our initial studies identified abnormalities in postnatal bile duct growth and remodeling in mice heterozygous for the *Jag1* conditional and null alleles, we sought to characterize differentially

**Table 2.** Validation of Microarray Data.

| Microarray Data     |             | PCR Array Data      |         | PCR Array Data      |         |
|---------------------|-------------|---------------------|---------|---------------------|---------|
| 4,8,12 week samples |             | 4,8,12 week samples |         | 4 week samples only |         |
| Gene Symbol         | Fold Change | Fold change         | p-value | Fold Change         | p-value |
| CD34                | 5.91        | 3.36                | 0.03*   | 4.61                | 0.04*   |
| Ddr1                | 3.44        | 3.85                | 0.13    | 6.74                | 0.007** |
| Dpt                 | 5.31        | 3.33                | 0.03*   | 3.89                | 0.02*   |
| Loxl1               | 3.47        | 3.99                | 0.07    | 4.31                | 0.02*   |
| Lum                 | 3.77        | 3.29                | 0.04*   | 4.81                | 0.04*   |
| Nid1                | 3.31        | 3.30                | 0.15    | 3.15                | 0.03*   |
| Osmr                | 4.17        | 2.33                | 0.20    | 3.61                | 0.07    |
| Pdgfrb              | 3.43        | 2.69                | 0.09    | 2.63                | 0.06    |

A custom PCR array was used to validate the fold changes found in the original microarray experiment. At the 4 week time point, 6 of the 8 genes investigated reached statistical significance, indicating the increased severity of the phenotype at the earlier time point. Ddr1 was the most highly up-regulated gene found with the most statistically significant p-value, thus prompting further investigation of the possible relationship between Jag1 and Ddr1. (\* =  $p \leq 0.05$ ; \*\* =  $p \leq 0.01$ ).

doi:10.1371/journal.pone.0084383.t002

expressed genes and pathways in mutant and control mouse livers [4]. We hypothesized that specific genes and pathways would be up- or down-regulated in the mutant mouse livers, and that the identification of these genes would improve our understanding of the pathways involved in postnatal bile duct growth and remodeling, as well as elucidate potential Notch pathway interactions. In order to assess global changes in gene regulation across different time points, we elected to study gene expression by microarray analysis in *Jag1* conditional/null mouse livers at 4, 8 and 12 weeks of age, as compared with littermate control samples. Biotinylated probes were generated for each sample and hybridized to Affymetrix® Mouse Genome 430A 2.0 GeneChip Arrays as described in detail in Materials and Methods. The results of this analysis are presented in Table 1.

Table 1 lists genes found to have increased expression levels in the mutant liver samples compared to controls, with a fold change greater than or equal to 2.5, and an uncorrected p-value of  $<0.05$ . Interestingly, many of the genes identified in this analysis are related to fibrosis, extracellular matrix interactions and remodeling, or cell adhesion, all of which are important in the process of bile duct remodeling. For example, *CD34*, up-regulated in the mutant liver samples with a fold change of 5.9, encodes a cell surface glycoprotein that functions as a cell-cell adhesion factor [15]. Similarly, *Dpt* (fold change 5.3) encodes dermatopontin, an extracellular matrix protein that may function in cell-matrix interactions and matrix assembly. Other up-regulated genes include those encoding components of the ECM and basement membrane (*Col6a3* and *Nid1*), as well as those known to bind collagen, such as *Ddr1* and lumican. In order to validate the results of the microarray, we designed a custom PCR array including eight of the most highly up-regulated genes and *Hprt* as a housekeeping gene for normalization (Table 2). We chose eight of the top twenty upregulated genes to study further on the PCR array based on their predicted functions in cell adhesion, ECM structure or interaction, and fibrosis (Tables 1 and 2). By using the PCR array approach as opposed to individual real time PCR assays, we were able to validate our findings in a single experiment. Using the same 4, 8 and 12-week samples as those

tested on the microarray, the PCR array showed upregulation in all 8 genes with similar fold changes, and reached statistical significance for 3 of the genes (*CD34*, *Dpt* and *Lum*;  $p < 0.05$ ). We also examined differential expression of these 8 genes specifically at 4 weeks of age ( $n = 3$ ), and found that all of the genes were up-regulated in the mutant samples with 6 of the 8 attaining statistical significance with p-values  $<0.05$ . Of interest, *Ddr1* was the most highly expressed gene at 4 weeks of age, with a fold change of 6.74 and a p-value of 0.007. Ddr1 protein levels are also increased in the mutant livers at 4 weeks age as compared with controls (Figure 1).

Given the increased expression of fibrosis- and ECM-related genes in the *Jag1* conditional/null liver samples, we assayed for the presence of fibrosis in mutant and control livers at postnatal time points between 4 and 12 weeks of age (Figure 2). At 4 weeks of age, Sirius Red staining demonstrates significant expansion of the portal tracts in the mutant liver with clear bridging fibrosis (Figure 2A) as compared with the littermate control (Figure 2B). Sirius red staining at earlier stages shows that fibrosis is detectable in the mutant livers as early as 2 weeks of age (data not shown). At 8 weeks of age, the degree of fibrosis in the mutant livers is less severe than that seen at 4 weeks of age (Figure 2C). By 12 weeks of age, the fibrosis appears to be resolving in the mutant livers, with mildly expanded portal tracts and a few thin bands of connective tissue extending between portal tracts (Figure 2E). This is in keeping with our prior finding of mild portal expansion at 12 weeks of age in the mutant livers [4]. At both 8 and 12 weeks of age, control livers show no significant fibrosis (Figure 2D and F). In order to investigate the striking early onset of hepatic fibrosis at 4 weeks of age in the *Jag1* conditional/null mutant animals, we performed PCR array analysis specifically for genes related to the extracellular matrix (ECM Array, SA Biosciences). Of the 84 ECM-related genes included on the array, 24 were significantly up-regulated in the *Jag1* conditional/null mutant livers at 4 weeks of age with p-values  $<0.05$  (9 with p-values  $<0.01$ , Table 3). Highly up-regulated genes include *Col1a1* and *Vcan*, both encoding structural proteins within the ECM. E-selectin (fold change 18.4) is a cell adhesion molecule expressed only on cytokine-activated endothelial cells and involved in inflammation, indicating global liver injury. In addition, elevated expression of multiple matrix metalloproteinases indicates active matrix remodeling. Only one gene, *Ecm1*, encoding Extracellular Matrix Protein 1, is significantly downregulated with a fold change of  $-4.06$ . *Ecm1* has been reported to inhibit the proteolytic activity of *Mmp9* [16]; therefore

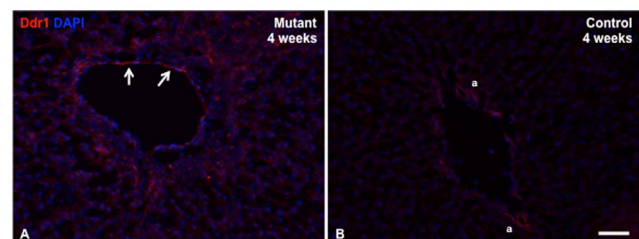

**Figure 1. Ddr1 protein expression is increased in mutant liver at 4 weeks of age.** A. Immunofluorescence staining shows increased expression of Ddr1 protein in the periportal region of the *Jag1* conditional/null mouse liver at 4 weeks of age. Arrows depict Ddr1 protein expression in the portal vein endothelium. B. In control liver, Ddr1 protein staining is visible in the arteries (a), but to a lesser extent in the peri-portal area. (Scale bar in [B] = 25  $\mu$ m for [A] and [B]). doi:10.1371/journal.pone.0084383.g001



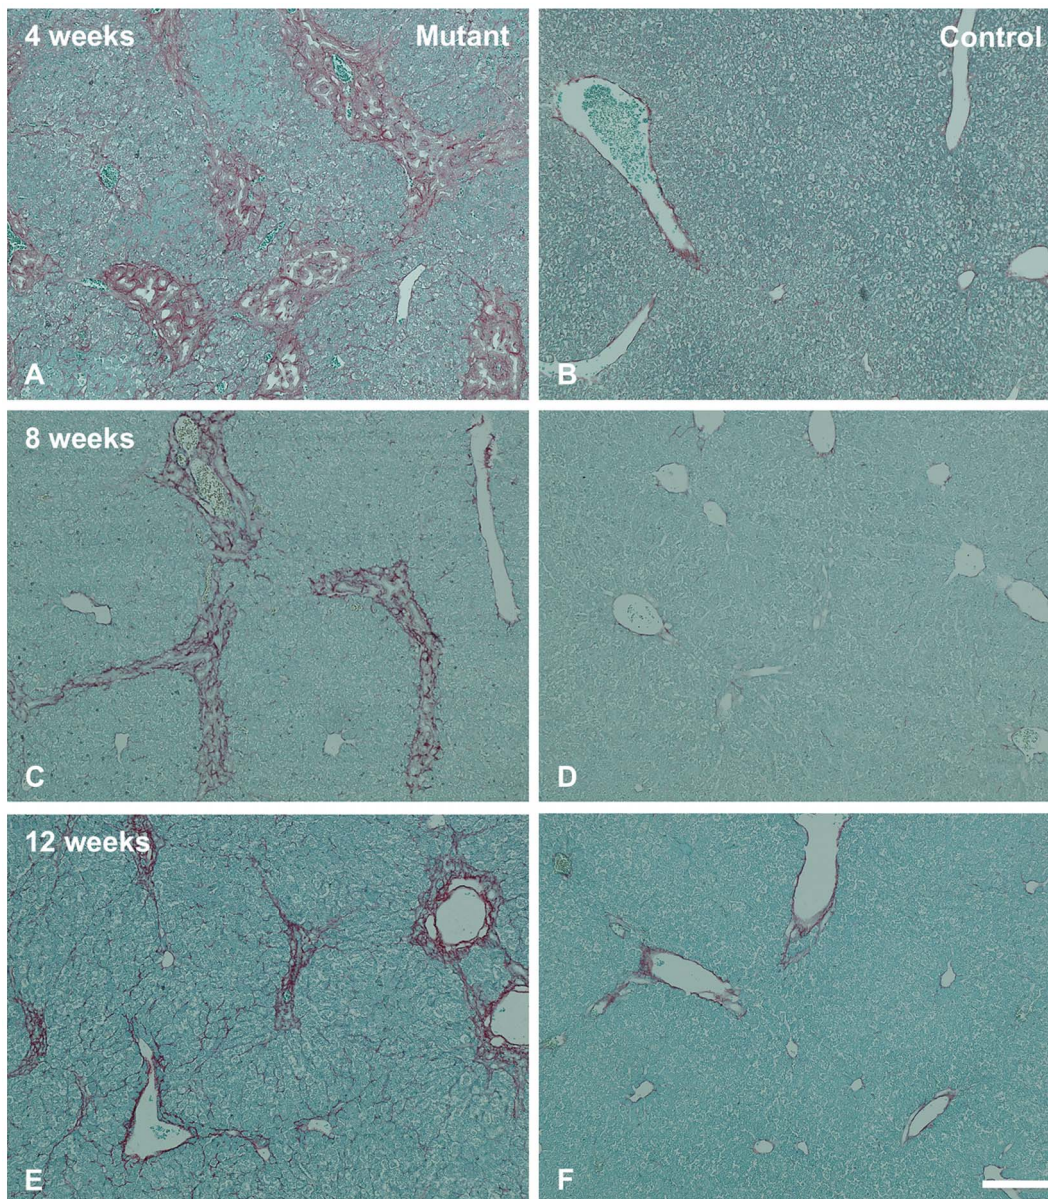

**Figure 2. Sirius Red staining demonstrates hepatic fibrosis in *Jag1* conditional/null livers.** A. Significant portal expansion with bridging fibrosis is visible in the *Jag1* conditional/null mutant liver at 4 weeks of age. B. Control liver does not show fibrosis at 4 weeks of age. C. Portal expansion is less prominent in the mutant liver at 8 weeks of age, but bridging fibrosis is still present in some area. D. Control liver shows no fibrosis at 8 weeks of age. E. At 12 weeks of age, fibrosis is improving in the *Jag1* conditional/null mutant livers. F. Control liver at 12 weeks of age shows no fibrosis. (Scale bar in [F] = 100  $\mu$  for [A] through [F]).

doi:10.1371/journal.pone.0084383.g002

its downregulation may be in keeping with the overall activation of matrix metalloproteinases and other matrix remodeling proteins in our model. Interestingly, by 12 to 16 weeks of age, gene expression levels had returned to baseline, suggesting that wound repair and remodeling were complete (Table 3).

In order to characterize the time course of *Jag1* expression in the *Jag1* conditional/null mutant livers, we performed real time PCR analysis on whole liver samples between newborn and 4 weeks of age (Figure 3). At the newborn timepoint, *Jag1* expression was significantly downregulated in the mutant livers with a fold change of  $-4.71$  ( $p = 0.002$ ), in keeping with ablation of *Jag1* from

hepatoblasts. Similarly, at 2 weeks of age, *Jag1* expression is diminished in the mutant livers with a fold change of  $-3.75$  ( $p = 0.0006$ ). By 3 and 4 weeks of age, *Jag1* expression remains decreased in the mutant livers but the values are no longer statistically significant. This finding correlates temporally with the onset of fibrosis and proliferation of other cell types that are able to express *Jag1* because they are not derived from hepatoblasts.

#### Jag1 and Ddr1 Interaction in Postnatal Liver

Given that *Ddr1* was one of the most highly up-regulated genes in the *Jag1* conditional/null mutant livers, and the fact that the

**Table 3.** Timecourse of Extracellular Matrix & Adhesion PCR Array Gene Expression.

| Gene Symbol | Gene Title                              | Fold Change |         |          |
|-------------|-----------------------------------------|-------------|---------|----------|
|             |                                         | 12–16 weeks | 4 weeks | p-value* |
| Cd44        | CD44 antigen                            | 1.19        | 2.78    | 0.044    |
| Cdh3        | Cadherin 3                              | -1.38       | 3.69    | 0.007    |
| Col1a1      | Collagen, type I, alpha 1               | -1.26       | 22.14   | 0.020    |
| Col3a1      | Collagen, type III, alpha 1             | -2.00       | 7.95    | 0.051    |
| Vcan        | Versican                                | -1.18       | 15.12   | 0.003    |
| Ecm1        | Extracellular matrix protein 1          | -1.38       | -4.06   | 0.003    |
| Fbln1       | Fibulin 1                               | 1.02        | 4.38    | 0.031    |
| Icam1       | Intercellular adhesion molecule 1       | 1.30        | 2.88    | 0.032    |
| Itgam       | Integrin alpha M                        | 1.47        | 5.52    | 0.006    |
| Itgax       | Integrin alpha X                        | 1.91        | 5.35    | 0.007    |
| Mmp11       | Matrix metalloproteinase 11             | 1.03        | 3.20    | 0.005    |
| Mmp13       | Matrix metalloproteinase 13             | 1.65        | 6.32    | 0.020    |
| Mmp15       | Matrix metalloproteinase 15             | 1.72        | 3.33    | 0.046    |
| Mmp2        | Matrix metalloproteinase 2              | 1.13        | 8.26    | 0.023    |
| Mmp3        | Matrix metalloproteinase 3              | -1.75       | 5.39    | 0.052    |
| Mmp7        | Matrix metalloproteinase 7              | 2.34        | 4.61    | 0.023    |
| Mmp8        | Matrix metalloproteinase 8              | 1.83        | 17.98   | 0.000    |
| Mmp9        | Matrix metalloproteinase 9              | 1.74        | 5.56    | 0.018    |
| Sele        | Selectin, endothelial cell              | 1.16        | 18.42   | 0.007    |
| Sell        | Selectin, lymphocyte                    | 1.57        | 3.31    | 0.053    |
| Spp1        | Secreted phosphoprotein 1 (Osteopontin) | -1.68       | 8.93    | 0.001    |
| Thbs1       | Thrombospondin 1                        | 1.17        | 8.64    | 0.016    |
| Thbs2       | Thrombospondin 2                        | 1.29        | 4.13    | 0.019    |
| Thbs3       | Thrombospondin 3                        | 1.46        | 5.34    | 0.033    |
| Tnc         | Tenascin C                              | -1.43       | 10.82   | 0.009    |

\*p-values listed are for the 4 week data only.

Real-time PCR was employed using the Extracellular Matrix & Adhesion molecules PCR Array to investigate the changes in gene expression related to fibrosis and injury over time. The data support a repair mechanism is likely active between the peak fibrotic phenotype at 4 weeks of age and 12–16 weeks of age.

doi:10.1371/journal.pone.0084383.t003

literature supports overlapping functions for these two genes, we investigated the expression patterns of *Jag1* and *Ddr1* in normal postnatal liver by immunofluorescence, and found that these two

proteins are extensively co-expressed. In the newborn liver, both *Jag1* and *Ddr1* are expressed in biliary cells (Figure 4A, box), which are still incompletely remodeled and resemble the ductal

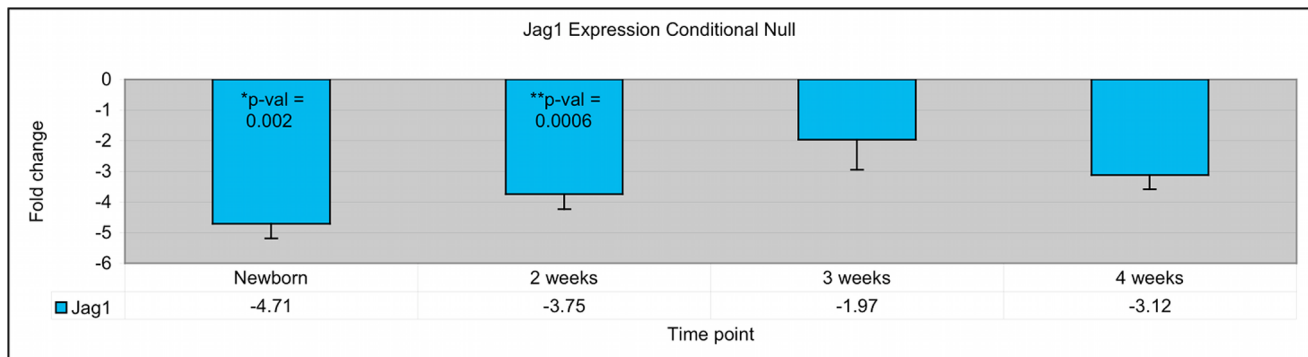

**Figure 3.** Time course of *Jag1* gene expression in *Jag1* conditional/null mouse liver samples. Measurement of *Jag1* expression in whole mouse liver by real time PCR reveals that *Jag1* expression is significantly decreased in *Jag1* conditional/null mutant livers at newborn and 2 week time points. At 3 and 4 weeks of age, *Jag1* expression is not significantly decreased in whole liver, possibly corresponding to increased *Jag1* expression in other cell types within the liver.

doi:10.1371/journal.pone.0084383.g003



plate in appearance. By 1 week of age, both Jag1 and Ddr1 are expressed in the portal mesenchyme (Figure 5A, C, arrows), which is in very close proximity to the bile duct (Figure 5E, arrow). Both proteins are also expressed in the hepatic artery (HA; Figure 5B, D, F) and the bile duct (Figure 5F). At a higher magnification, Jag1 and Ddr1 protein are localized to the cell junctions within the bile duct (Figure 5G, H, I). Strong expression of both proteins continues at 2 weeks in the hepatic artery and bile ducts (Figure 6A, B, C). Specifically, Jag1 and Ddr1 are co-localized at cell junctions between biliary cells (Figure 6A, B, arrow). The extensive co-expression and subcellular co-localization of Jag1 and Ddr1 suggests that these two proteins may interact directly in the postnatal liver.

In order to demonstrate interaction between Jag1 and Ddr1, we performed immunoprecipitation and co-immunoprecipitation experiments using whole liver lysate from C57Bl/6J mice at 2 weeks of age. In the immunoprecipitation experiment, Ddr1-coupled resin pulled down the 63 kD alpha subunit and the 54 kD beta subunit of the Ddr1 protein (Figure 7A). The same two bands were visible when Jag1-coupled resin was used in a co-immunoprecipitation experiment, probing the membrane with Ddr1 antibody (Figure 7B). In the control lane (Figure 7C), an irrelevant Tie-2 antibody was used for the immunoprecipitation and the membrane was again probed with Ddr1 antibody, with no visible bands. In the opposite experiment, Ddr1-coupled resin was used to co-immunoprecipitate Jag1. Probing the membrane with Jag1 antibody did not demonstrate a band consistent with full length Jag1, but did reveal two smaller bands (~40 kD and ~52 kD), consistent with Jag1 degradation products ([17]; data not shown). To date, collagen proteins are the only known ligands for Ddr1. Further studies will be required to determine whether Jag1 can act as a functional ligand for Ddr1.

## Discussion

In this study, we have identified up-regulated expression of ECM- and fibrosis-related genes in *Jag1* conditional/null mouse livers by microarray analysis. These findings were validated by real time PCR on a custom PCR array, and expanded analysis using a targeted array showed widespread increases in expression of ECM-related genes in mutant livers at 4 weeks of age. Interestingly, these changes in gene expression resolved completely by 12 weeks of age. In addition, we have identified a novel protein interaction between Jag1 and Ddr1, which may have relevance to tissue remodeling and repair.

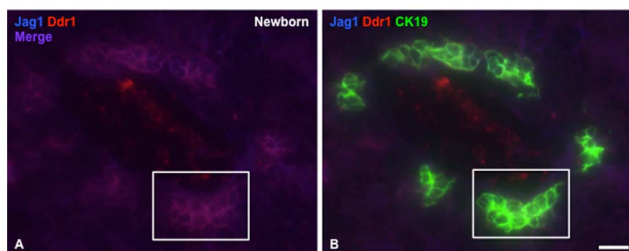

**Figure 4. Jag1 and Ddr1 are co-expressed in newborn mouse liver.** A. Immunofluorescence staining shows co-localization of Jag1 (blue) and Ddr1 (red) proteins in immature biliary cells surrounding the portal vein in C57Bl/6J mouse liver. B. Cytokeratin 19 staining (CK19, green) identifies the cells expressing Jag1 and Ddr1 as being of biliary origin. (Scale bar in [B]) = 25  $\mu$ m for [A] and [B]). doi:10.1371/journal.pone.0084383.g004

As we interrogated the literature for information about the differentially expressed genes identified in the microarray experiment, several lines of evidence suggested that Ddr1 would be an intriguing candidate for in depth study. First, Ddr1 encodes a receptor tyrosine kinase activated directly by collagen ligands, implying a role in cellular communication with the extracellular matrix. In fact, Ddr1 has been implicated in cell migration and ECM remodeling during branching tubulogenesis in mammary gland and bronchial development [5], both of which share similarities with biliary morphogenesis. Ddr1 has not been studied extensively in the liver, but overexpression of Ddr1 has been detected in diseased human liver [18] and in early recurrence of hepatocellular carcinoma [19]. Interestingly, Ddr1 has been implicated in a number of different human cancers, possibly enhancing cell proliferation via direct activation of canonical Notch1 signaling [11]. Also of interest is the finding that Ddr1 was identified as a potential cell surface marker for hepatic progenitors in a microarray study of rat liver [20]. Furthermore, mice lacking Ddr1 demonstrate inner ear defects similar to those seen in the Headturner mouse (Htu), a Jag1 loss of function mutant [8,10]. Finally, Ddr1 was highly and significantly upregulated in the *Jag1* conditional/null mutant livers at 4 weeks of age, the timepoint with the most dramatic phenotype of fibrosis and cellular unrest. The extensive co-localization of Jag1 and Ddr1 in postnatal liver, combined with co-immunoprecipitation data indicating protein-protein interaction and a shared domain between Jag1 and the known Ddr1 ligands, all point towards a novel protein interaction. Additionally, Ddr1 has been shown to activate canonical Notch signaling [11], suggesting that upregulation of Ddr1 might compensate for the loss of Jag1 in our conditional knockout model in the postnatal period. Given the temporal-spatial expression patterns of these two genes, it is likely that they are actively involved during biliary and arterial development and remodeling.

Precedent exists in the literature for Jag1 to interact with proteins outside the canonical Notch signaling pathway. For example, the ECM glycoprotein MAGP-2 has been found to interact with Jag1 and induce its shedding from the cell surface [21]. In addition, MAGP-2 promotes angiogenesis by antagonizing Notch signaling in endothelial cells through effects on Jag1 [22]. Thus, MAGP-2 is able to directly modulate Notch signaling via Jag1, and to a lesser extent, other Notch pathway ligands. The effect of the interaction between Jag1 and Ddr1 is as yet uncharacterized, but it is possible that Ddr1 may induce shedding of soluble Jag1 protein into the extracellular matrix. Soluble Jag1 has been found to have effects on cellular differentiation in epithelial keratinocytes [23]. Alternatively, Jag1 may act as an alternative ligand for Ddr1, with resultant effects on expression of downstream genes. Collagen, the primary ligand for Ddr1, has also been shown to interact directly with the Notch ectodomain to repress canonical Notch signaling [24]. It is certain that the Jag1/Ddr1 interactions are complex and likely to result in a myriad of downstream alterations in gene expression within the microenvironment of the extracellular matrix. Further studies will be required to fully elucidate these novel functions.

In this study, we demonstrate marked upregulation of ECM-related genes in the *Jag1* conditional/null mutant livers at 4 weeks of age that is completely resolved by 12 weeks of age (Table 3). In agreement with this finding, Sirius red staining of liver tissue in these animals shows portal expansion progressing to bridging fibrosis by 4 weeks of age (Figure 2), but at later time points fibrosis is minimal [4]. These data suggest that the loss of Jag1 early in development results in a cascade of events causing activation of pro-fibrogenic pathways, but the process does not appear to be

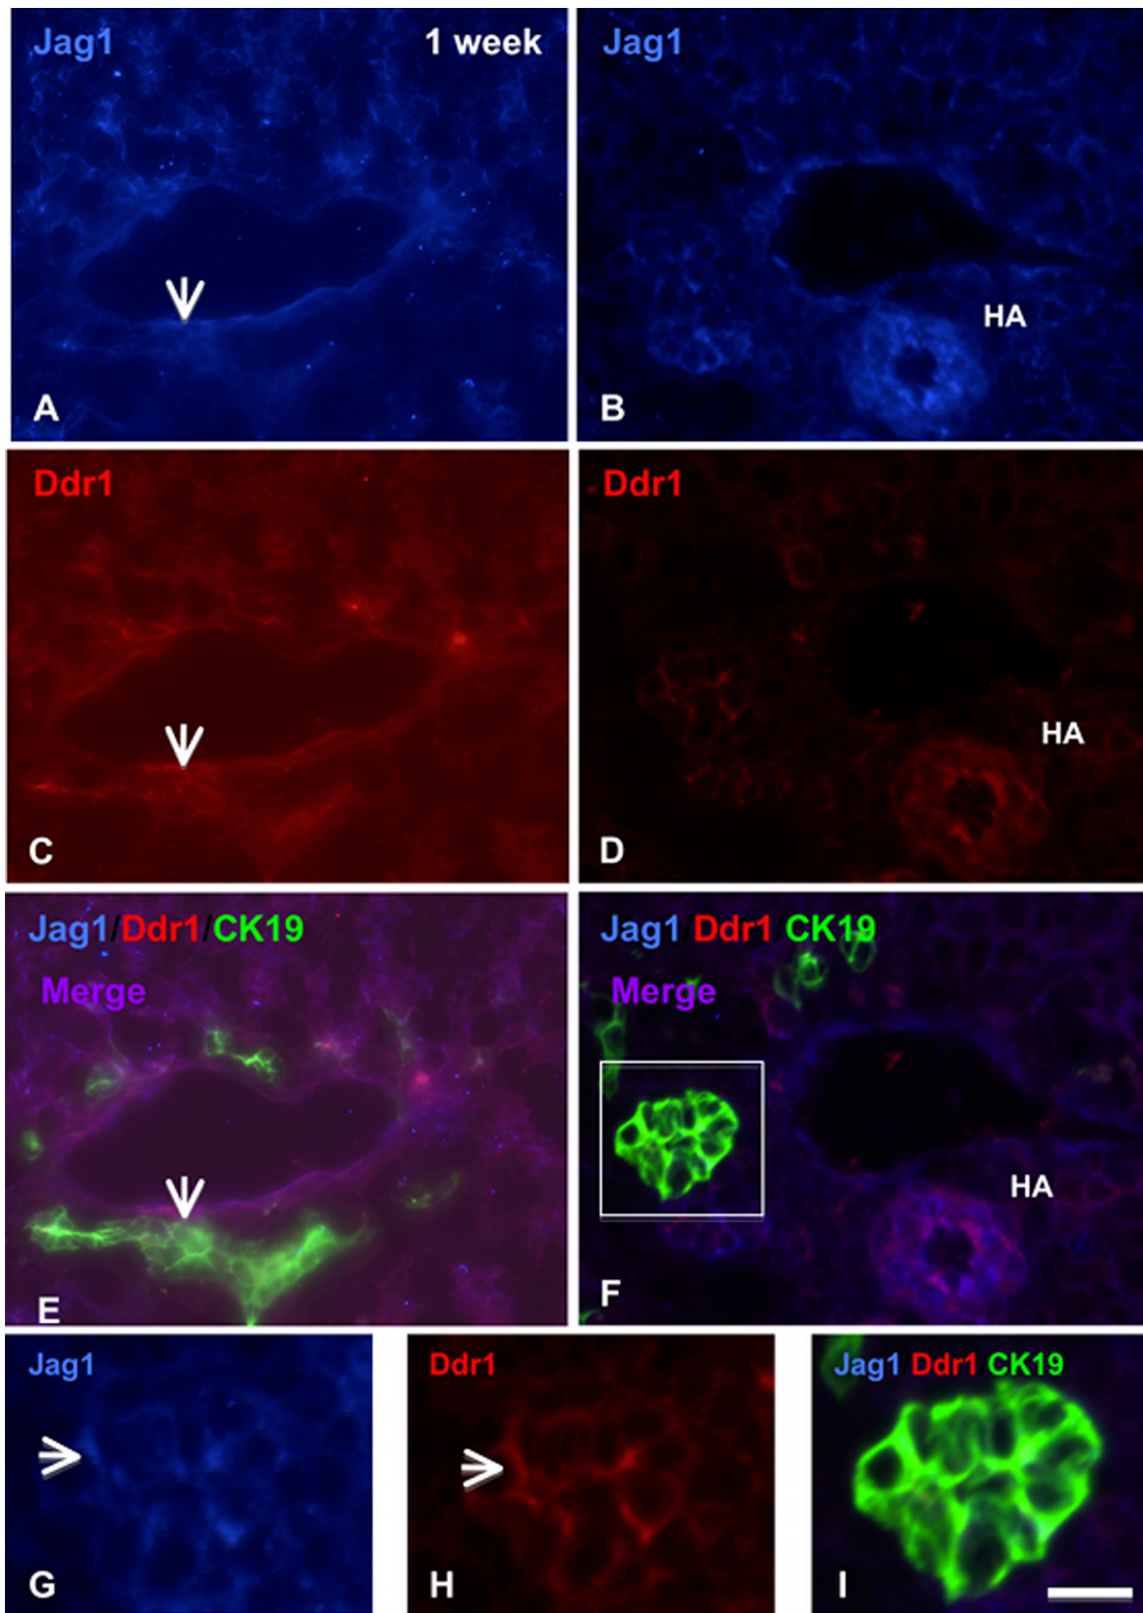

**Figure 5. Jag1 and Ddr1 are co-expressed in mouse liver at 1 week of age.** A, C, E. Jag1 and Ddr1 are co-expressed in the portal mesenchyme in C57Bl/6J mouse liver at 1 week of age, in close proximity to the bile duct (arrow). B, D, F. Jag1 and Ddr1 are also co-localized in the hepatic artery at 1 week of age in the mouse liver. G, H, I. High magnification view of the bile duct (boxed area in F) shows expression of Jag1 and Ddr1 in the intercellular junctions (arrows, G and H). (Scale bar in [I] = 25  $\mu$  for [A] through [I]).  
doi:10.1371/journal.pone.0084383.g005



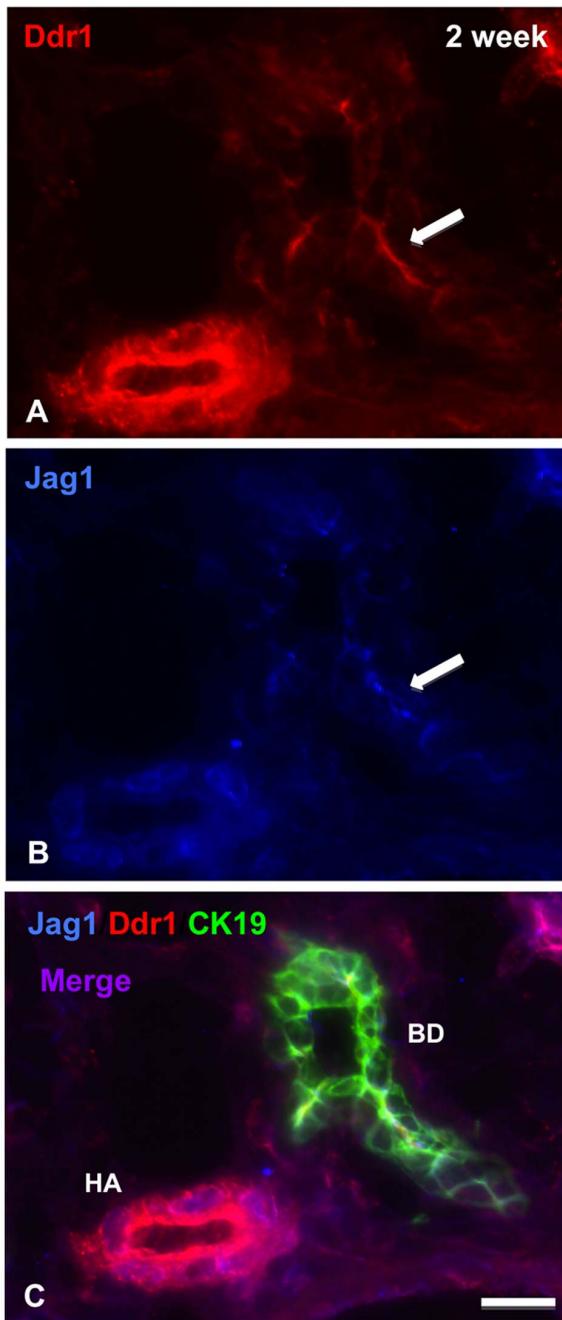

**Figure 6. Jag1 and Ddr1 are co-localized in hepatic artery and bile duct at 2 weeks of age.** A, B, C. Ddr1 (red) and Jag1 (blue) are expressed in hepatic artery in the mouse liver at 2 weeks of age (HA, panel C). While Jag1 is highly expressed in the endothelium, Ddr1 expression appears to be confined to the smooth muscle wall of the blood vessel. Ddr1 and Jag1 are both expressed in areas of intercellular junctions within bile ducts (arrows, panels A and B). (Scale bar in [C] = 25  $\mu$  for [A] through [C]).  
doi:10.1371/journal.pone.0084383.g006

progressive. One possible explanation for the resolution of fibrosis over a series of weeks is that Jag1 expression levels are increased in other cell types, as shown by the gradual increase in Jag1 expression over the first 4 weeks in the mutant animals (Figure 3). Both Jag1 and Ddr1 have been identified as key components of

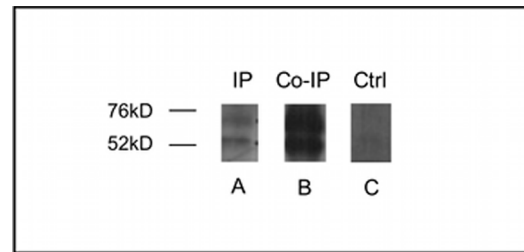

**Figure 7. Co-immunoprecipitation of Jag1 and Ddr1.** A. Immunoprecipitation of Ddr1 reveals two primary bands corresponding to the Ddr1 subunits, visualized at 54 kDa and 63 kDa. These proteins represent the alpha-(membrane-bound) and beta-subunits (soluble) of Ddr1. B. Coupling of Jag1 antibody to the aminolink resin and probing of western blot with Ddr1 antibody reveals co-immunoprecipitation of Jag1 and Ddr1 in mouse liver, with strong bands visualized at 54 kDa and 63 kDa. C. As a control experiment, Tie-2 antibody was coupled to the aminolink resin. Probing the western blot with Ddr1 antibody reveals no specific bands.  
doi:10.1371/journal.pone.0084383.g007

wound healing and smooth muscle cell migration [7,25,26]. Specifically, Jag1 expression increases upon vascular injury, and a soluble form of Jagged1, presumed to act in a dominant negative fashion, had a negative effect on cell-matrix adhesion and cell migration in an *in vitro* injury model [26]. Cadherin-mediated intercellular junctions and focal adhesion complexes were also altered in the cells overexpressing soluble Jagged1. Interestingly, both Jag1 and Ddr1 are expressed in biliary cell junctions in mouse liver at 1 and 2 week timepoints (Figures 5 and 6). In addition, Ddr1 has been found to play a crucial role in smooth muscle cell migration, proliferation and neointimal thickening following arterial injury [7]. Ddr1 was also found to enhance epithelial repair in a human bronchial epithelial cell model through increased expression of matrix metalloproteinases [27]. Jag1 and Ddr1 are also both involved in regulating E-cadherin, a gene known to affect cell migration, invasion and epithelial-to-mesenchymal transition [28–30]. It is therefore possible that Jag1 and Ddr1 may play a role in reversal of fibrosis and downregulation of ECM-related genes at later timepoints in our mutant model.

In summary, we have presented microarray results, expression data and co-immunoprecipitation experiments that suggest a novel protein interaction between the Notch ligand Jag1 and the receptor tyrosine kinase Ddr1. The nature of this interaction and its functional consequences are as yet unclear, but further studies will be required to investigate the implications for bile duct remodeling and repair of liver injury.

## Acknowledgments

The authors would like to acknowledge Rebecca Oakey, D.Phil., for reading the manuscript and providing helpful comments. We also acknowledge Eric Rappaport for helpful discussions of the data. In addition, the authors are grateful for the support of the Fred and Suzanne Biesecker Pediatric Liver Center at The Children's Hospital of Philadelphia.

## Author Contributions

Conceived and designed the experiments: LAU KML. Performed the experiments: LAU EC AN MJR. Analyzed the data: LAU RS KML. Contributed reagents/materials/analysis tools: RS. Wrote the paper: LAU KML.

## References

- Kamath BM, Bauer RC, Loomes KM, Chao G, Gerfen J, et al. (2012) NOTCH2 mutations in Alagille syndrome. *J Med Genet* 49: 138–144. doi:10.1136/jmedgenet-2011-100544.
- Warthen DM, Moore EC, Kamath BM, Morrisette JJ, Sanchez-Lara PA, et al. (2006) Jagged1 (JAG1) mutations in Alagille syndrome: increasing the mutation detection rate. *Hum Mutat* 27: 436–443. doi:10.1002/humu.20310.
- McDaniell R, Warthen DM, Sanchez-Lara PA, Pai A, Krantz ID, et al. (2006) NOTCH2 Mutations Cause Alagille Syndrome, a Heterogeneous Disorder of the Notch Signaling Pathway. *Am J Hum Genet* 79: 5–5. doi:10.1086/505332.
- Loomes KM, Russo P, Ryan M, Nelson A, Underkoffler L, et al. (2007) Bile duct proliferation in liver-specific Jag1 conditional knockout mice: effects of gene dosage. *Hepatology* 45: 323–330. doi:10.1002/hep.21460.
- Vogel WF, Abdulhussain R, Ford CE (2006) Sensing extracellular matrix: An update on discoidin domain receptor function. *Cellular Signalling* 18: 1108–1116. doi:10.1016/j.cellsig.2006.02.012.
- Vogel WF, Gish GD, Alves F, Pawson T (1997) The Discoidin Domain Receptor Tyrosine Kinases are Activated by Collagen. *Molecular Cell* 1: 13–23.
- Hou G (2002) Tyrosine Kinase Activity of Discoidin Domain Receptor 1 Is Necessary for Smooth Muscle Cell Migration and Matrix Metalloproteinase Expression. *Circulation Research* 90: 1147–1149. doi:10.1161/01.RES.0000022166.74073.FB.
- Gottesberge zum AM, Gross O, Becker-Lenzian U, Massing T, Vogel WF (2008) Inner ear defects and hearing loss in mice lacking the collagen receptor DDR1. *Lab Invest* 88: 27–37. doi:10.1038/labinvest.3700692.
- Wang C-Z, Hsu Y-M, Tang M-J (2005) Function of discoidin domain receptor I in HGF-induced branching tubulogenesis of MDCK cells in collagen gel. *J Cell Physiol* 203: 295–304. doi:10.1002/jcp.20227.
- Kierman AE, Ahituv N, Fuchs H, Balling R, Avraham KB, et al. (2001) The Notch ligand Jagged1 is required for inner ear sensory development. *Proceedings of the National Academy of Sciences* 98: 3873–3878.
- Kim HG, Hwang SY, Aaronson SA, Mandinova A, Lee SW (2011) DDR1 Receptor Tyrosine Kinase Promotes Prosurvival Pathway through Notch1 Activation. *Journal of Biological Chemistry* 286: 17672–17681. doi:10.1074/jbc.M111.236612.
- Xue Y, Gao X, Lindsell CE, Norton CR, Chang B, et al. (1999) Embryonic lethality and vascular defects in mice lacking the Notch ligand Jagged1. *Hum Mol Genet* 8: 723–730.
- Zhang L, Rubins NE, Ahima RS, Greenbaum LE, Kaestner KH (2005) Foxa2 integrates the transcriptional response of the hepatocyte to fasting. *Cell Metab* 2: 141–148. doi:10.1016/j.cmet.2005.07.002.
- Ryan MJ, Bales C, Nelson A, Gonzalez DM, Underkoffler L, et al. (2008) Bile duct proliferation in Jag1/fringe heterozygous mice identifies candidate modifiers of the Alagille syndrome hepatic phenotype. *Hepatology* 48: 1989–1997. doi:10.1002/hep.22538.
- Nielsen JS, McNagny KM (2008) Novel functions of the CD34 family. *Journal of Cell Science* 121: 4145–4145. doi:10.1242/jcs.03504.
- Fujimoto N, Terlizzi J, Aho S, Brittingham R, Fertala A, et al. (2006) Extracellular matrix protein 1 inhibits the activity of matrix metalloproteinase 9 through high-affinity protein/protein interactions. *Exp Dermatol* 15: 300–307. doi:10.1111/j.0906-6705.2006.00409.x.
- Lu F, Morrisette JJD, Spinner NB (2003) Conditional JAG1 Mutation Shows the Developing Heart Is More Sensitive Than Developing Liver to JAG1 Dosage. *Am J Hum Genet* 72: 6–6. doi:10.1086/374386.
- Song S, Shackel NA, Wang XM, Ajami K, McCaughan GW, et al. (2011) Discoidin Domain Receptor 1: Isoform expression and potential functions in cirrhotic human liver. *The American Journal of Pathology* 178: 1134–1144. doi:10.1016/j.ajpath.2010.11.068.
- Jian ZX, Sun J, Chen W, Jin HS, Zheng JH, et al. (2012) Involvement of discoidin domain 1 receptor in recurrence of hepatocellular carcinoma by genome-wide analysis. *Medical Oncology* 29(5): 3077–82. doi: 10.1007/s12032-012-0277.
- Yovchev MI, Grozdanov PN, Joseph B, Gupta S, Dabeva MD (2007) Novel hepatic progenitor cell surface markers in the adult rat liver. *Hepatology* 45: 139–149. doi:10.1002/hep.21448.
- Nehring LC, Miyamoto A, Hein PW, Weinmaster G, Shipley JM (2005) The extracellular matrix protein MAGP-2 interacts with Jagged1 and induces its shedding from the cell surface. *Journal of Biological Chemistry* 280: 20349–20355. doi:10.1074/jbc.M500273200.
- Albig AR, Becenti DJ, Roy TG, Schiemann WP (2008) Microfibril-associate glycoprotein-2 (MAGP-2) promotes angiogenic cell sprouting by blocking notch signaling in endothelial cells. *Microvasc Res* 76: 7–14. doi:10.1016/j.mvr.2008.01.001.
- Aho S (2004) Soluble form of Jagged1: Unique product of epithelial keratinocytes and a regulator of keratinocyte differentiation. *Journal of Cellular Biochemistry* 92: 1271–81.
- Zhang X, Meng H, Wang MM (2013) Collagen represses canonical Notch signaling and binds to Notch ectodomain. *International Journal of Biochemistry and Cell Biology* 45: 1274–80.
- Kwon SM, Eguchi M, Wada M, Iwami Y, Hozumi K, et al. (2008) Specific Jagged-1 Signal From Bone Marrow Microenvironment Is Required for Endothelial Progenitor Cell Development for Neovascularization. *Circulation* 118: 157–165. doi:10.1161/CIRCULATIONAHA.107.754978.
- Lindner V, Booth C, Prudovsky I, Small D, Maciag T, et al. (2001) Members of the Jagged/Notch Gene Families Are Expressed in Injured Arteries and Regulate Cell Phenotype via Alterations in Cell Matrix and Cell-Cell Interaction. *The American Journal of Pathology* 159: 875–883. doi:10.1016/S0002-9440(10)61763-4.
- Roberts ME, Magowan L, Hall IP, Johnson SR (2011) Discoidin domain receptor 1 regulates bronchial epithelial repair and matrix metalloproteinase production. *Eur Respir J* 37: 1482–1493. doi:10.1183/09031936.00039710.
- Chen J, Imanaka N, Chen J, Griffin JD (2009) Hypoxia potentiates Notch signaling in breast cancer leading to decreased E-cadherin expression and increased cell migration and invasion. *British Journal of Cancer* 102: 351–360. doi:10.1038/sj.bjc.6605486.
- Leong KG, Niessen K, Kulic I, Raouf A, Eaves C, et al. (2007) Jagged1-mediated Notch activation induces epithelial-to-mesenchymal transition through Slug-induced repression of E-cadherin. *Journal of Experimental Medicine* 204: 2935–2948. doi:10.1084/jem.20071082.
- Eswaramoorthy R, Wang C-K, Chen W-C, Tang M-J, Ho M-L, et al. (2010) DDR1 regulates the stabilization of cell surface E-cadherin and E-cadherin-mediated cell aggregation. *J Cell Physiol* 224: 387–397. doi:10.1002/jcp.22134.
